# Supplementary material
Source: PubMed Central journal article supplement (PMC7109092)
Supplement: 41423_2019_237_MOESM1_ESM.pdf [file 41423_2019_237_MOESM1_ESM.pdf]

## Supplementary Information

### **Fig.S1 TNF- $\alpha$ autocrine is dispensable for IFN- $\gamma$ -induced cell death.**

(a) The indicated knockout L929 cell lines were treated with DMSO (ctrl), IFN- $\gamma$ , IFN- $\gamma$ +GSK872 (10 $\mu$ M) for 36h and cell survival was determined by measuring ATP levels. ( **b-d** ) TOP: The indicated knockout L929 cell lines were treated with DMSO (ctrl), zVAD, IFN- $\gamma$ , IFN- $\gamma$ +zVAD or TNF for 36h and cell survival was determined by measuring ATP levels. Bottom: RIPK1, FADD, Caspase-8, GAPDH levels in the indicated knockout L929 cell lines were determined by Western blot. For **a-d**, data are from n = 3 independent experiments. Error bars represent mean  $\pm$  s.e.m. of n = 3 independent experiments. Two-tailed Student's t-test was applied for P values; \* $P < 0.05$ , \*\* $P < 0.01$ . For **b-d** (down), results shown are representative of three independent experiments.

### **Fig.S2 PKR is not required for IFN- $\gamma$ -induced cell death.**

(a-c) TOP: The indicated knockout L929 cell lines were treated with DMSO (ctrl), zVAD, IFN- $\gamma$ , IFN- $\gamma$ +zVAD for 36h and cell survival was determined by measuring ATP levels. Bottom: RIPK1, PKR, GAPDH levels in the indicated knockout L929 cell lines were determined by Western blot. For **a-c**, data are from n = 3 independent experiments. Error bars represent mean  $\pm$  s.e.m. of n = 3 independent experiments. Two-tailed Student's t-test was applied for P values; \*\* $P < 0.01$ . For **a-c** (down), results shown are representative of three independent experiments.

### **Fig. S3 Flag-RIPK3 reconstitution restores IFN-induced necroptosis.**

(a)The indicated knockout L929 cell lines that were infected with lentivirus expressing vector encoding nothing, or FLAG-RIPK3. Then these cells were treated with DMSO (ctrl) zVAD, IFN- $\gamma$  or IFN- $\gamma$ +zVAD for 36h. Cell survival was determined by measuring ATP levels. Two-tailed Student's t-test was applied for P values; \*\* $P < 0.01$ . (b) RIPK3, GAPDH protein levels in the cells described above were determined by Western blot.

**Fig. S4 Overexpression of ZBP1 and dimerization of ZBP1-CD induces cell death in WT L929 cells.**

**(a)** Left: WT L929 cell lines that were infected with gradually increased dose of lentivirus expressing vector encoding FLAG-ZBP1. L929 cells infected with empty vector and treated with nothing (-) or IFN- $\gamma$  for 36h were included as control. Cell survival was determined by measuring ATP levels (Left panel); ZBP1, GAPDH protein levels were determined by Western blot (Right panel). **(b)** WT L929 cell lines that were infected with lentivirus expressing vector encoding FLAG-HBD-CD, and then treated with ethanol (Ctrl), 4-OHT. L929 cells infected with empty vector and treated with nothing (-) or IFN- $\gamma$  for 36h were included as control. Cell survival was determined by measuring ATP levels (Left panel). ZBP1, HBD-CD, GAPDH protein levels were determined by Western blot. Cell survival data are from n = 3 independent experiments. Error bars represent mean  $\pm$  s.e.m. of n = 3 independent experiments. Western blot results shown are representative of three independent experiments.

**Fig. S5 The role of RIPK1 kinase activity and RIPK1's association with JAK1-STAT1 in IFN $\gamma$ -induced necroptosis**

**(a)** The FADD KO and Caspase-8 KO L929 cell lines were treated with DMSO, Nec-1(30 $\mu$ M), IFN- $\gamma$ , IFN- $\gamma$ +Nec-1 for 36h and the cell survival was determined by measuring ATP levels. **(b)** 293T cells were transfected with the plasmids as indicated. Total cell lysates and anti-FLAG immunoprecipitates were immunoblotted to detect the indicated proteins. For **a**, data are from n = 3 independent experiments. Error bars represent mean  $\pm$  s.e.m. of n = 3 independent experiments. For **b**, results shown are representative of three independent experiments.

**Fig. S6 The generation and validation of ZBP1<sup>-/-</sup> mice and various knockout cell lines.**

**(a)** Genomic DNA sequence of ZBP1 locus in ZBP1<sup>-/-</sup> mice generated by CRISPR/Cas9. **(b)** ZBP1 and GAPDH protein levels in ZBP1<sup>+/+</sup> and ZBP1<sup>-/-</sup> bone marrow-derived macrophages stimulated with IFN- $\gamma$  and IFN- $\beta$ . **(c)** Age- and sex-matched WT and ZBP1 KO mice were injected with TNF through the tail vein, respectively. N=6 mice for each group, data are pooled from two independent

experiments. **(d)** Genomic DNA sequences of *FADD* locus in *FADD* KO L929 cells. **(e)** Genomic DNA sequences of *Caspase-8* locus in *Caspase-8* KO L929 cells. **(f)** Genomic DNA sequences of *MLKL* locus in *RIPK1/MLKL* DKO L929 cells, *RIPK1/MLKL* DKO L929 cells were generated by targeting *MLKL* in *Rip1* KO L929 cells. **(g)** Genomic DNA sequences of *MLKL* locus in *FADD/MLKL* DKO L929 cells, *FADD/MLKL* DKO L929 cells were generated by targeting *MLKL* in *FADD* KO L929 cells. **(h)** Genomic DNA sequences of *RIPK3* locus in *FADD/RIPK3* DKO L929 cells, *FADD/RIPK3* DKO L929 cells were generated by targeting *RIPK3* in *FADD* KO L929 cells. **(i)** Genomic DNA sequences of *RIPK3* locus in *Caspase-8/RIPK3* DKO L929 cells, *Caspase-8/RIPK3* DKO L929 cells were generated by targeting *RIPK3* in *Caspase-8* KO L929 cells.

**Fig. S7 Sequence information of knockout cell lines.**

**(a)** Genomic DNA sequences of *ZBP1* locus in *RIPK1/ZBP1* DKO L929 cells, *RIPK1/ZBP1* DKO L929 cells were generated by targeting *ZBP1* in *RIPK1* KO L929 cells. **(b)** Genomic DNA sequences of *ZBP1* locus in *FADD/ZBP1* DKO L929 cells, *FADD/ZBP1* DKO L929 cells were generated by targeting *ZBP1* in *FADD* KO L929 cells. **(c)** Genomic DNA sequences of *RIPK1* locus in *TNFR1/RIPK1* DKO L929 cells, *TNFR1/RIPK1* DKO L929 cells were generated by targeting *RIPK1* in *TNFR1* KO L929 cells. **(d)** Genomic DNA sequences of *TNFR1* locus in *TNFR1/FADD* DKO L929 cells, *TNFR1/FADD* DKO L929 cells were generated by targeting *TNFR1* in *FADD* KO L929 cells. **(e)** Genomic DNA sequences of *Caspase-8* locus in *TNFR1/Caspase-8* DKO L929 cells, *TNFR1/Caspase-8* DKO L929 cells were generated by targeting *Caspase-8* in *TNFR1* KO L929 cells. **(f)** Genomic DNA sequences of *PKR* locus in *PKR* KO L929 cells. **(g)** Genomic DNA sequences of *PKR* locus in *FADD/PKR* DKO L929 cells, *FADD/PKR* DKO L929 cells were generated by targeting *PKR* in *FADD* KO L929 cells. **(h)** Genomic DNA sequences of *PKR* locus in *Caspase-8/PKR* DKO L929 cells, *Caspase-8/PKR* DKO L929 cells were generated by targeting *PKR* in *Caspase-8* KO L929 cells. **(i)** Genomic DNA sequences of *RIPK1* locus in *PKR/RIPK1* DKO L929 cells, *PKR/RIPK1* DKO L929 cells were generated by targeting *RIPK1* in *PKR* KO L929 cells.

Figure S1

a

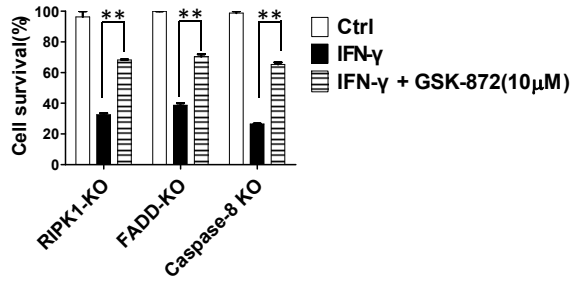

b

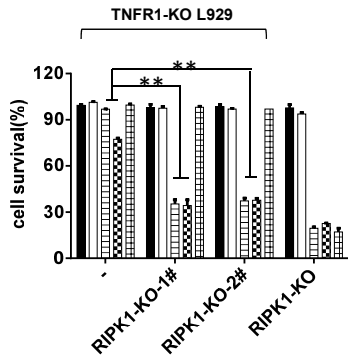

c

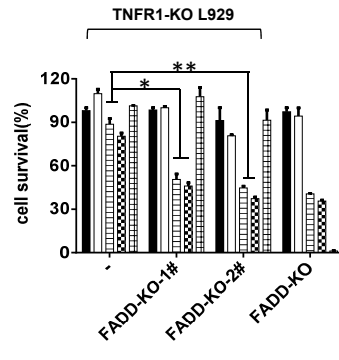

d

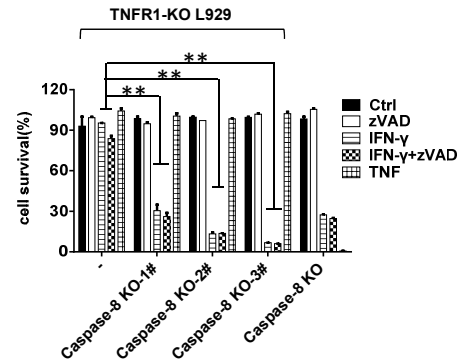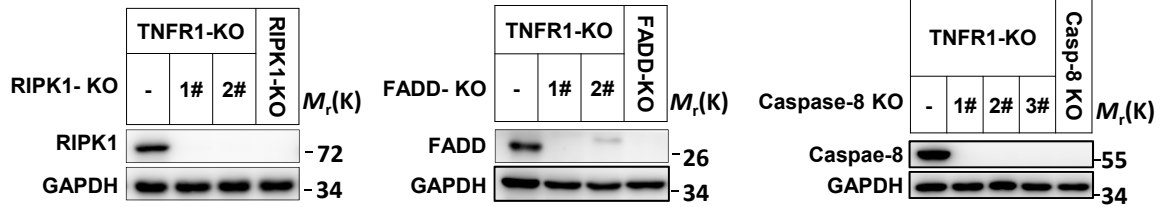

Figure S2

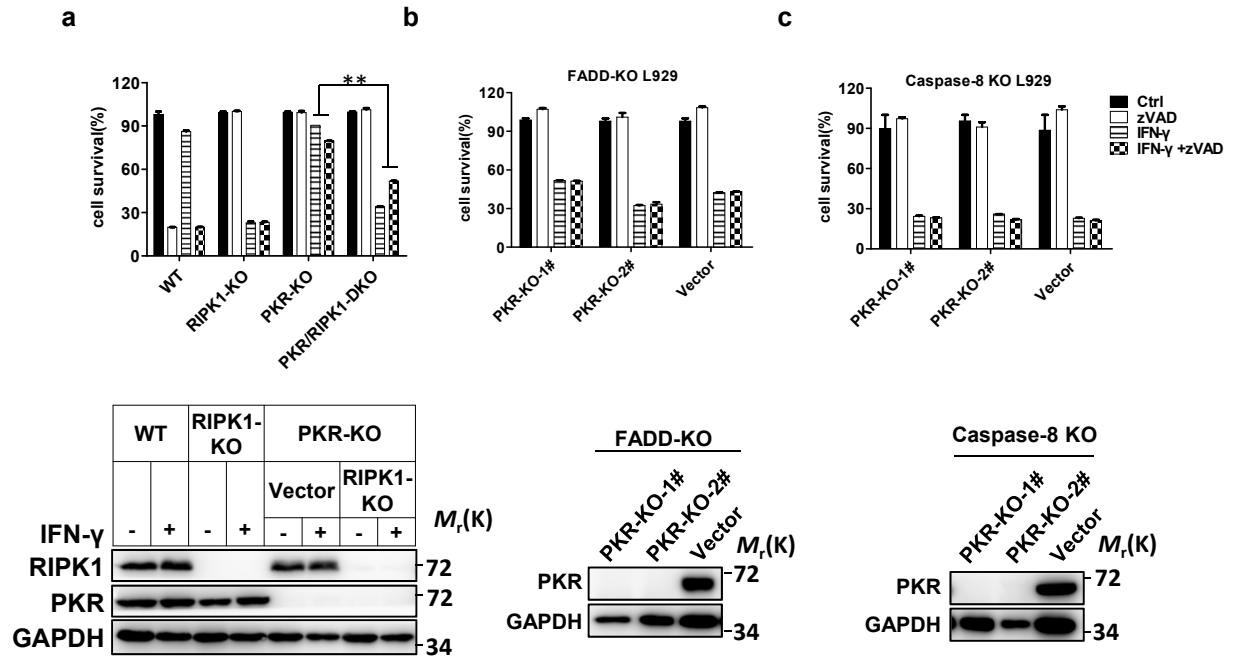

Figure S3

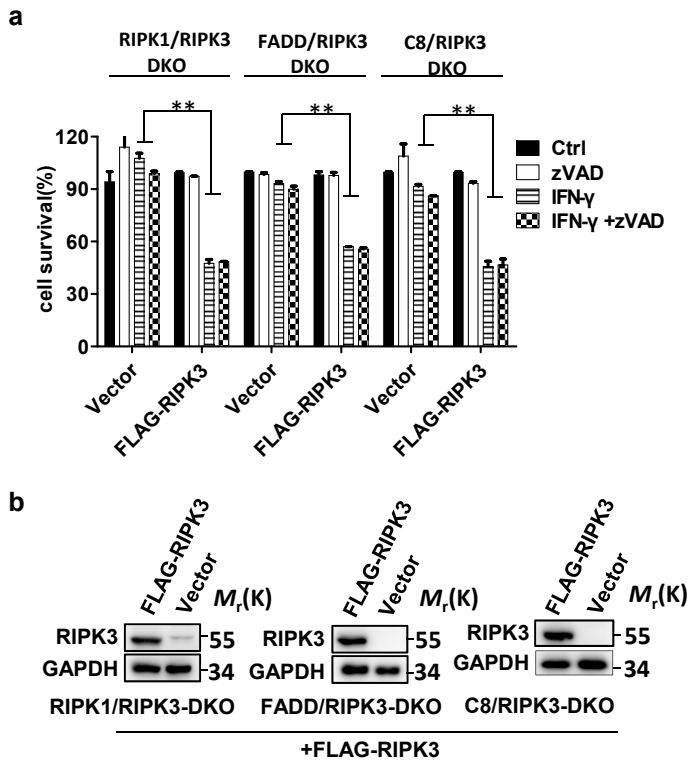

Figure S4

a

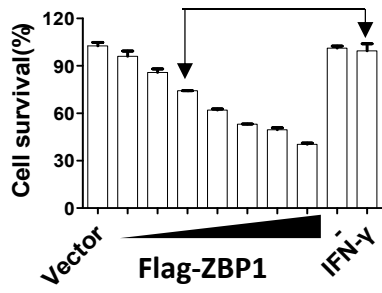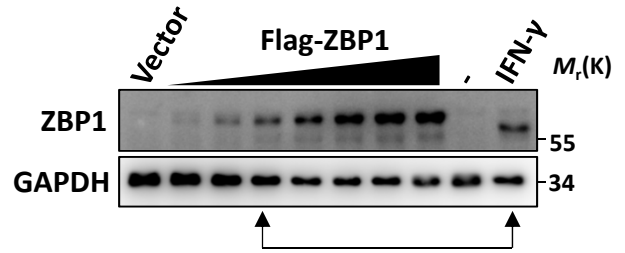

b

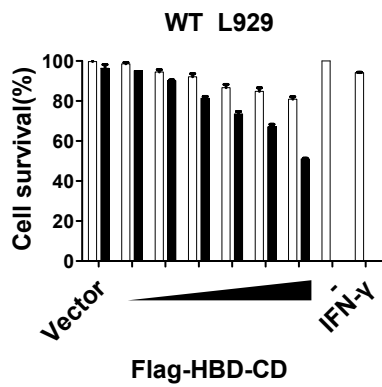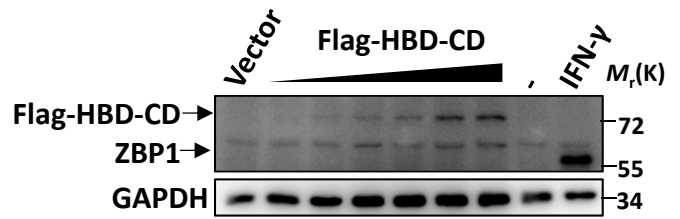

Figure S5

a

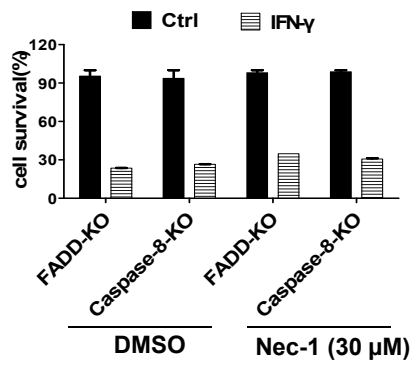

b

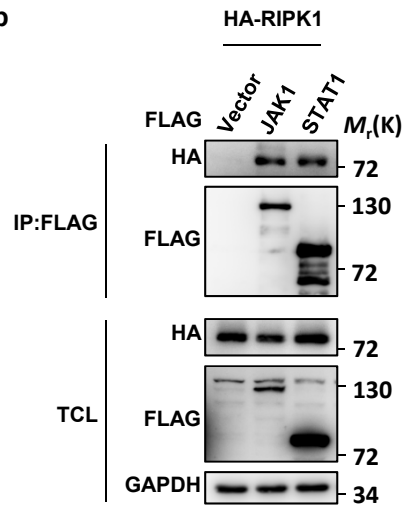



Figure S6

a

WT **GCTATGACGGACAGACGTGGAAGATCTACCACTCA**CGTCA**GGAAGGCCAAGACATAG**  
 KO **GCTATGACGGACAGACGTGGAAGATTTACCACTCA**-----**GGAAGGCCAAGACATAG**

b

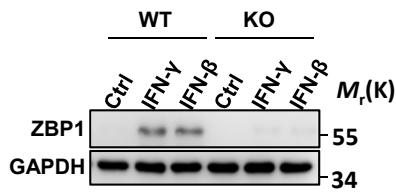

c

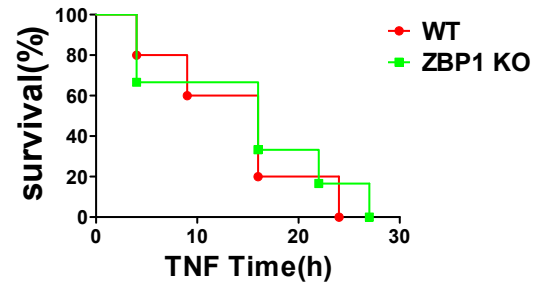

d

FADD-KO  
 FADD-wt **TCAAGTTCCTGTGCGCG****CGAGCGCGTGAGCAAACGAAAGCTGGAGCGCG**  
 FADD KO-allele-1 **TCAAGTTCCTGTGCGCG**-----**GAGCGCGTGAGCAAACGAAAGCTGGAGCGCG**  
 FADD KO-allele-2 **TCAAGTTCCTGTGCGCG**-----**CGCGCGTGAGCAAACGAAAGCTGGAGCGCG**  
 FADD KO-allele-3 **TCAAGTTCCTGTGCGCG**-----**GACCGCGTGA****CAAACA****AAAGCTGGAGCGCG**

e

Caspase-8 KO  
 Caspase-8-wt **TTTCCACATCAGTCGGTGGGACCTGCTGG**-----**TCAACTTCCTAGAC**  
 Caspase-8 KO-allele-1 **TTTCCACATCAG**-----**GTCAACTTCCTAGAC**  
 Caspase-8 KO-allele-2 **TTTCCACATCAGTCGGTGGGACCTGCTGGGT****CAACTTCCTAGAC**  
 Caspase-8 KO-allele-3 **TTTCCACATCAGTCGGTGGGACCTGCT**-----**CAACTTCCTAGAC**

f

RIPK1/MLKL-DKO  
 MLKL-wt **ATTGGAATACCGTTTCAGATGTCAGCCAGCCAGCATCCTGGCA**  
 MLKL KO-allele-1 **ATTGGAAT**-----**G**-----**CCAGCATCCTGGCA**  
 MLKL KO-allele-2 **ATTGGAATACCGTTTCAG**-----**CCAGCATCCTGGCA**  
 MLKL KO-allele-3 **ATTGGAATACCGTTT**-----**CCACATCCTGGCA**

g

FADD/MLKL-DKO  
 MLKL-wt **GGTTTATCATTGGAATACCGTTTCAGATGTCAGCCAGCCAGCATCCTGGCA****GCAGCAGGAAGATC**  
 MLKL KO-allele-1 **GGTTTATCATTGGAATACCGTTTCAG**-----**A****CATCCTGGCA****CCGGCAGGAAGATC**  
 MLKL KO-allele-2 **GGTTTATCATTGGAAT**-----**G**-----**CCAGCATCCTGGCA****GCAGCAGGAAGATC**  
 MLKL KO-allele-3 **GGTTTATCATTGGAATACCGTTTCAG**-----**CCAGCATCCTGGCA****GCAGCAGGAAGATC**

h

FADD/RIPK3-DKO  
 RIPK3-wt **ATTCTGCTGGATCCAGAGCTCCACGCCAAGGTTAGT**  
 RIPK3 KO-allele-1 **ATTCTGCTGGATCCCA**-----**CCCGCCAAGGTTAGT**  
 RIPK3 KO-allele-2 **ATTCTGCTGGATCCA**-----**CGCCAAGGTTAGT**  
 RIPK3 KO-allele-3 **ATTCTGCTGGATCCAG**-----**CTCGCCAAGGTTAGT**

i

Caspase-8/RIPK3-DKO  
 RIPK3-wt **ATTCTGCTGGATCCAGAGCTCCACGCCAAGGTTAGTCCA**  
 RIPK3 KO-allele-1 **ATTCTGCTGGATCCAGAGC**-----**CACGCCAAGGTTAGTCCA**  
 RIPK3 KO-allele-2 **ATTCTGCTGGATCCCA**-----**CCAAGGTTAGTCCA**  
 RIPK3 KO-allele-3 **ATTCTGCTGGATCCAGAGC**-----**CCCGCCAAGGTTAGTCCA**

Figure S7

a

**RIPK1/ZBP1-DKO**

ZBP1-wt TGACGGACAGACGTGGAGATCTAC CACTCACGTCAGGAAGGCCAAGACATAGGTATGAC  
 ZBP1 KO-allele-1 TGACGGACAGACGTGGAGAGAC-----ATAGGTATGAC  
 ZBP1 KO-allele-2 TGACGGACAGACGT-----ATATAC-----ATAGGTATGAC  
 ZBP1 KO-allele-3 TGACGGACAGAC-----ATAGGTATGAC

b

**FADD/ZBP1-DKO**

ZBP1-wt GATCTACCACTCAC-CTCAGGAGGCCAAGACATA  
 ZBP1 KO-allele-1 GATCTACCACTCC---TCAGGAGGCCAAGACATA  
 ZBP1 KO-allele-2 GATCTACCACTACCCTCAGGAGGCCAAGACATA  
 ZBP1 KO-allele-3 GATCTACCACTT---CTCAGGAGGCCAAGACATA

c

**TNFR1/RIPK1-DKO**

RIPK1-wt TAGAAGAAGGGAACATACTCGCTGGTATGGAGTACATGGAGAAGGGCAAC  
 RIPK1 KO-allele-1 TAGAAGAAGGGAACATA-----TGGAGAAGGGCAAC  
 RIPK1 KO-allele-2 TAGAAGAAGGGAACATACT--CTGGTATGGAGTACATGGAGAAGGGCAAC  
 RIPK1 KO-allele-3 TAGAAGAAGGGAACATA--CGCTGGTATGGAGTACATGGAGAAGGGCAAC

d

**TNFR1/FADD-DKO**

TNFR1-wt ACCTGAGTGAGACACACTTCAGTCCGTGGACTGCAGCCCCCTGCTCAACGGCACCGTGACAATCCCCTGTGAGCACCGGTACCCC  
 TNFR1 KO-allele-1 ACCTGAGTGAGACACACTTC-----C-----CTGGATGACCGGTACCCC  
 TNFR1 KO-allele-2 ACCTGAGTGAGACACACTTCAGTCCGTGGACTGCAGCCCCCTGCTCAACGGCACCGTGACAATCCCCTGTGAGCACCGGTACCCC  
 TNFR1 KO-allele-3 ACCTGAGTGAGACACACTTCAGTCCGTGGACTGCAGCCCCCTGCTCAACGGCACCGTGACAATCCCCTGTGAGCACCGGTACCCC

e

**TNFR1/Caspase-8**

Caspase-8-wt GTCGGTGGGACCTGCTGGTCAACTTCCTAGAC  
 Caspase-8 KO-allele-1 GTCGGTGGGACCTGCTG---CAACTTCCTAGAC  
 Caspase-8 KO-allele-2 GTCGGTGGGACCTGCTG-TCAACTTCCTAGAC  
 Caspase-8 KO-allele-3 GTCGGTGGGACCTG---TCAACTTCCTAGAC

f

**PKR-KO**

PKR-wt AAAATGGCCAGTGA---ACCCCAAGTTTCTACATGGA  
 PKR KO-allele-1 AAAATGGCCAGTGA---ACCCCAAGTTTCTACATGGA  
 PKR KO-allele-2 AAAATGGCCAGTGA---ACCCCAAGTTTCTACATGGA  
 PKR KO-allele-3 AAAATGGCCAGTGA-TACCCCAAGTTTCTACATGGA

g

**FADD/PKR-DKO**

PKR-wt AGGCCACTGGGAGGAAAAATGGCCAGTGA-ACCCCAAGTTTCTA  
 PKR KO-allele-1 AGGCCACTGGCCATTTTCTCTCCAGTGGCTGAAAGTTTCTA  
 PKR KO-allele-2 AGGCCACTGGGAGGAAA-----AATGGC-----AGTTTCTA  
 PKR KO-allele-3 AGGCCACTGGGAGGAAAAATGGCCAGTGA-ACCCCAAGTTTCTA

h

**Caspase-8/PKR-DKO**

PKR-wt AAAATGGCCAGTGA-TACCCCAAGTTTCTACATGGACAAA  
 PKR KO-allele-1 AAAATGGCCAGT---ATACCCAAGTTTCTACATGGACAAA  
 PKR KO-allele-2 AAAATGGCCAGTGA---CCCAAGTTTCTACATGGACAAA  
 PKR KO-allele-3 AAAATGGCCAGTGAATACCCAAGTTTCTACATGGACAAA

i

**PKR/RIPK1-DKO**

RIPK1-wt CATCATAGAAGAGGGAACATAT-----CGCTGGT-----ATGGAGTACATGGAGAAGGG  
 RIPK1 KO-allele-1 CATCATAGAAGAGGGAACATATGATGTGATGATGGTGTGTGATGGAGACATGGAGAAGGG  
 RIPK1 KO-allele-2 CATCATAGAAGAGGGAACATAT-----CGCTGGT-----ATGGAGTACATGGAGAAGGG  
 RIPK1 KO-allele-3 CATCATAGAAGAGT-----CCATGGAGTACATGGAGAAGGG
